# Supplementary material
Source: HighWire-hosted journal article supplement (https://gut.bmj.com/content/69/7/1239)

**Supplementary figure 1**

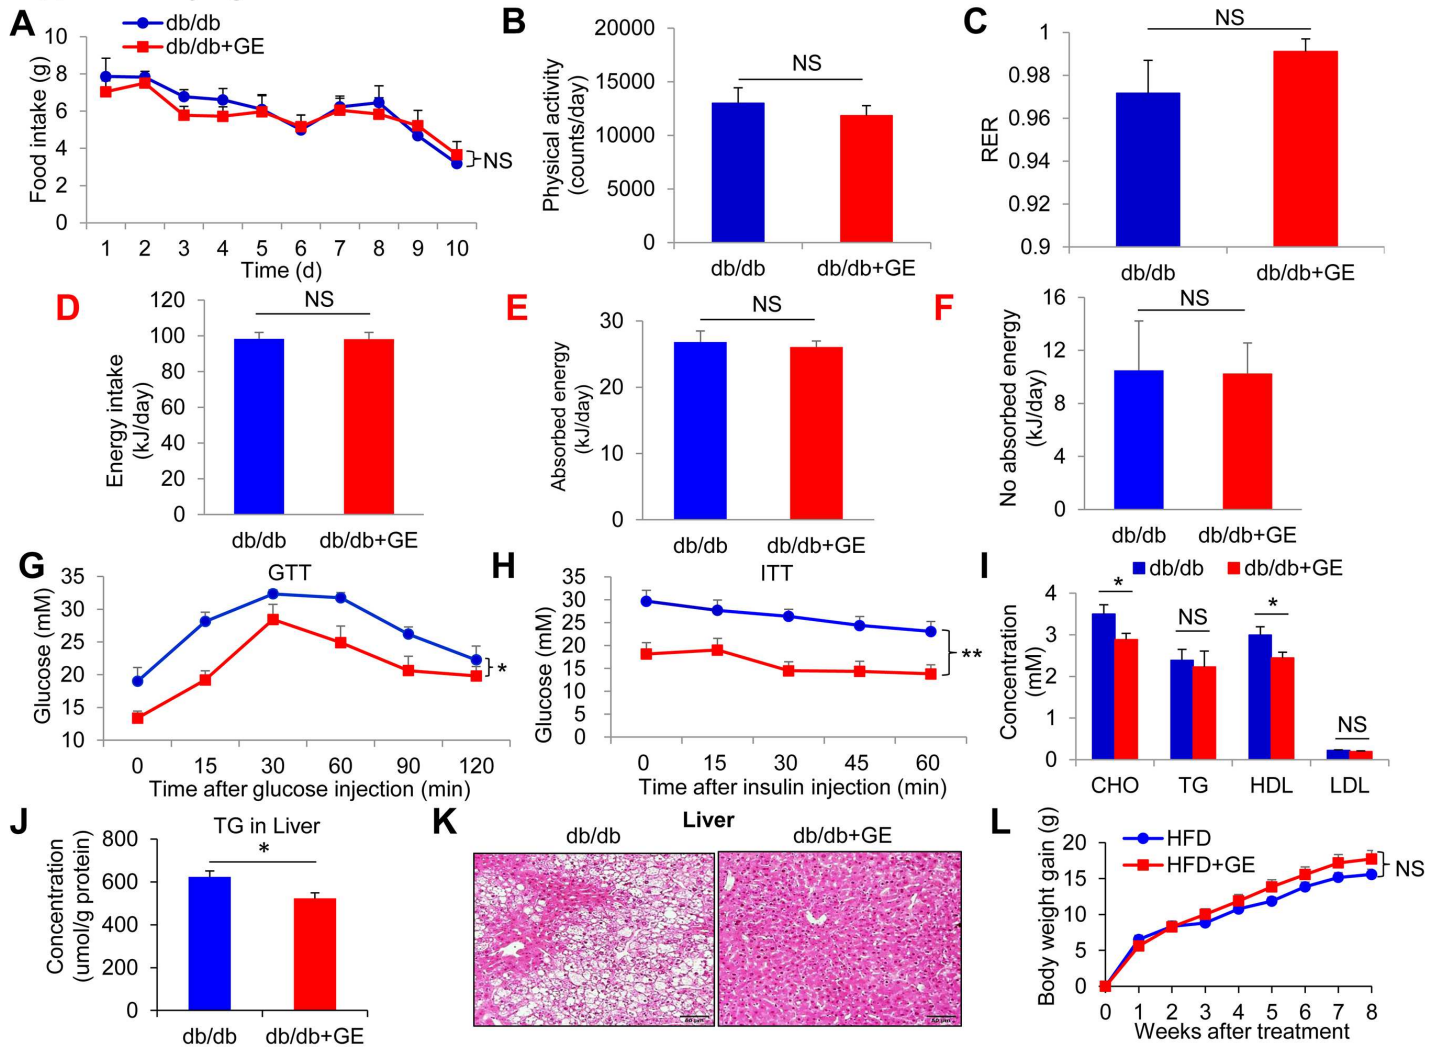

Supplement: inline-supplementary-material-1 [file inline-supplementary-material-1.pdf]

Supplementary figure 2

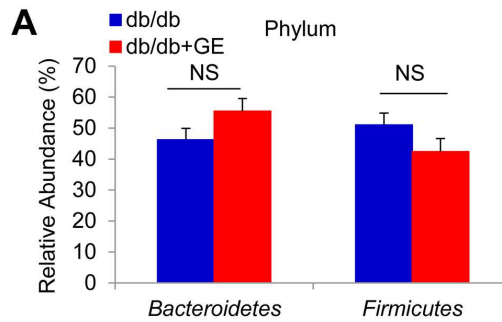

B

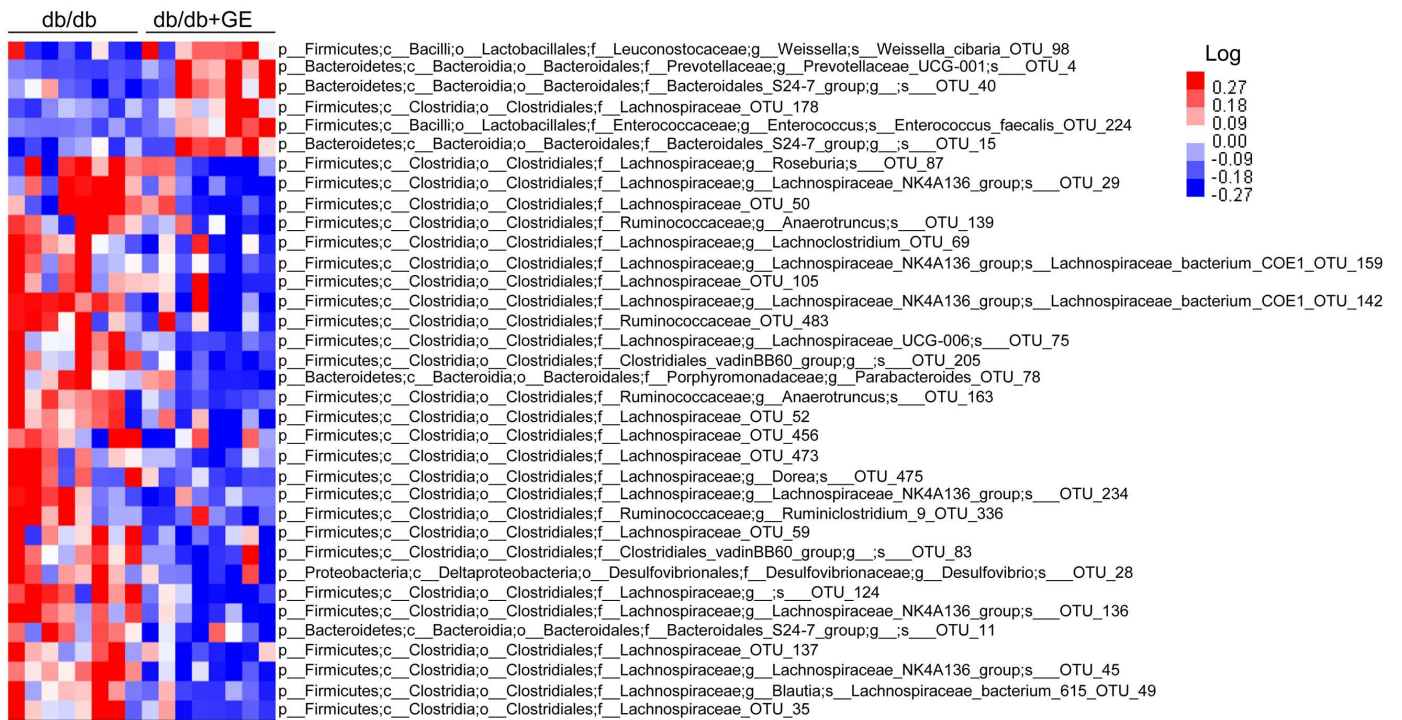

Supplement: inline-supplementary-material-3 [file inline-supplementary-material-3.pdf]

## Supplementary figure 3

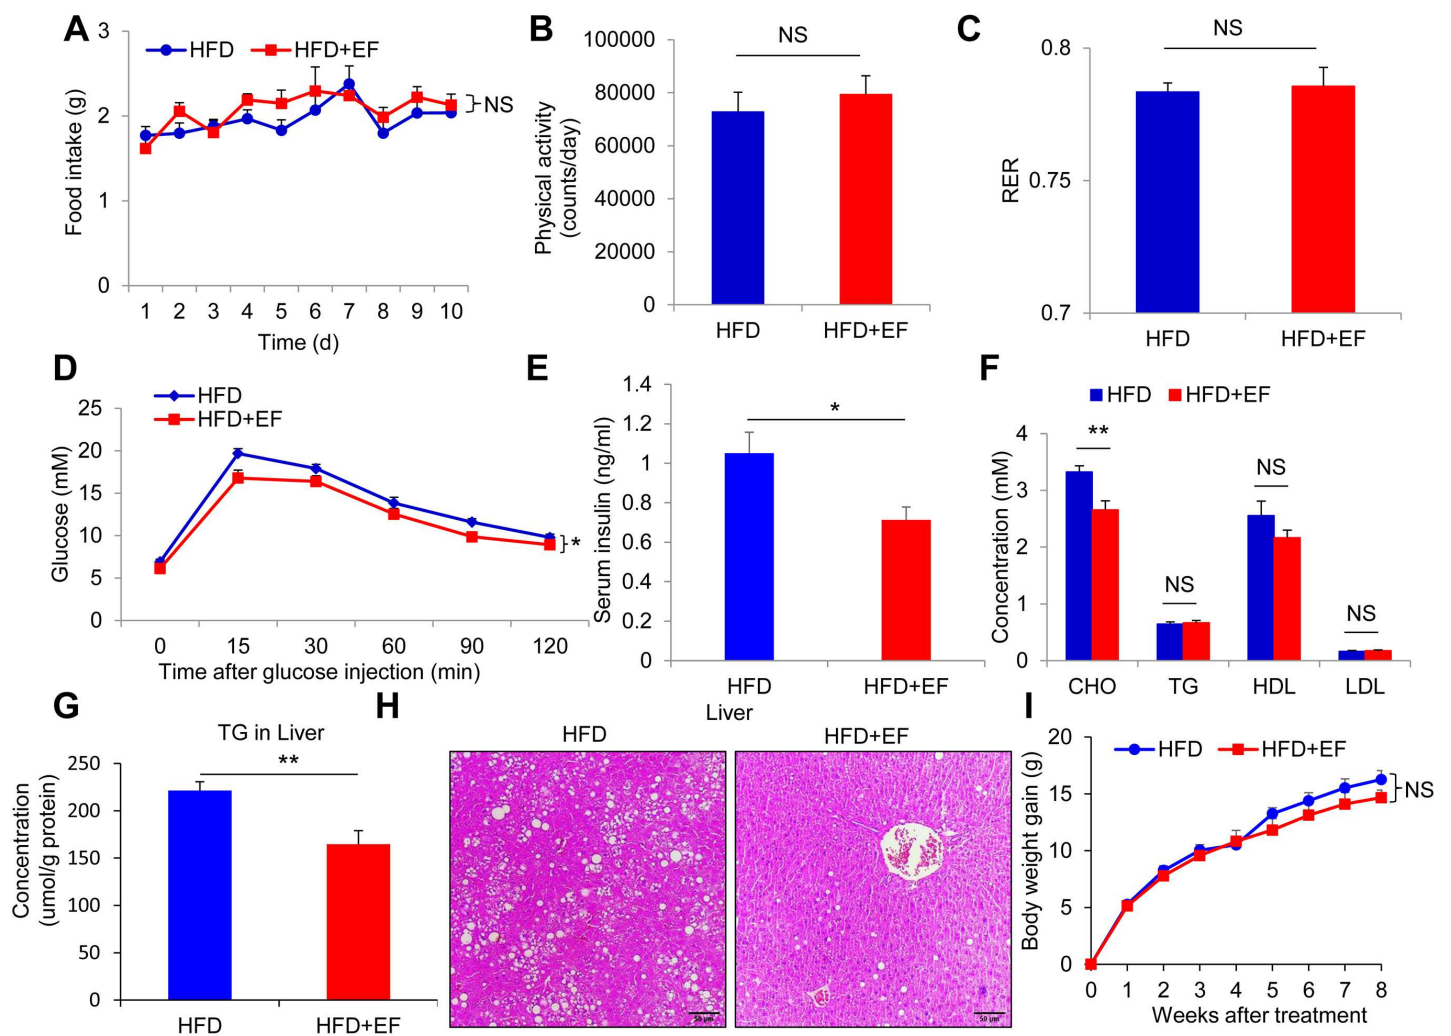

Supplement: inline-supplementary-material-4 [file inline-supplementary-material-4.pdf]

## Supplementary figure 4

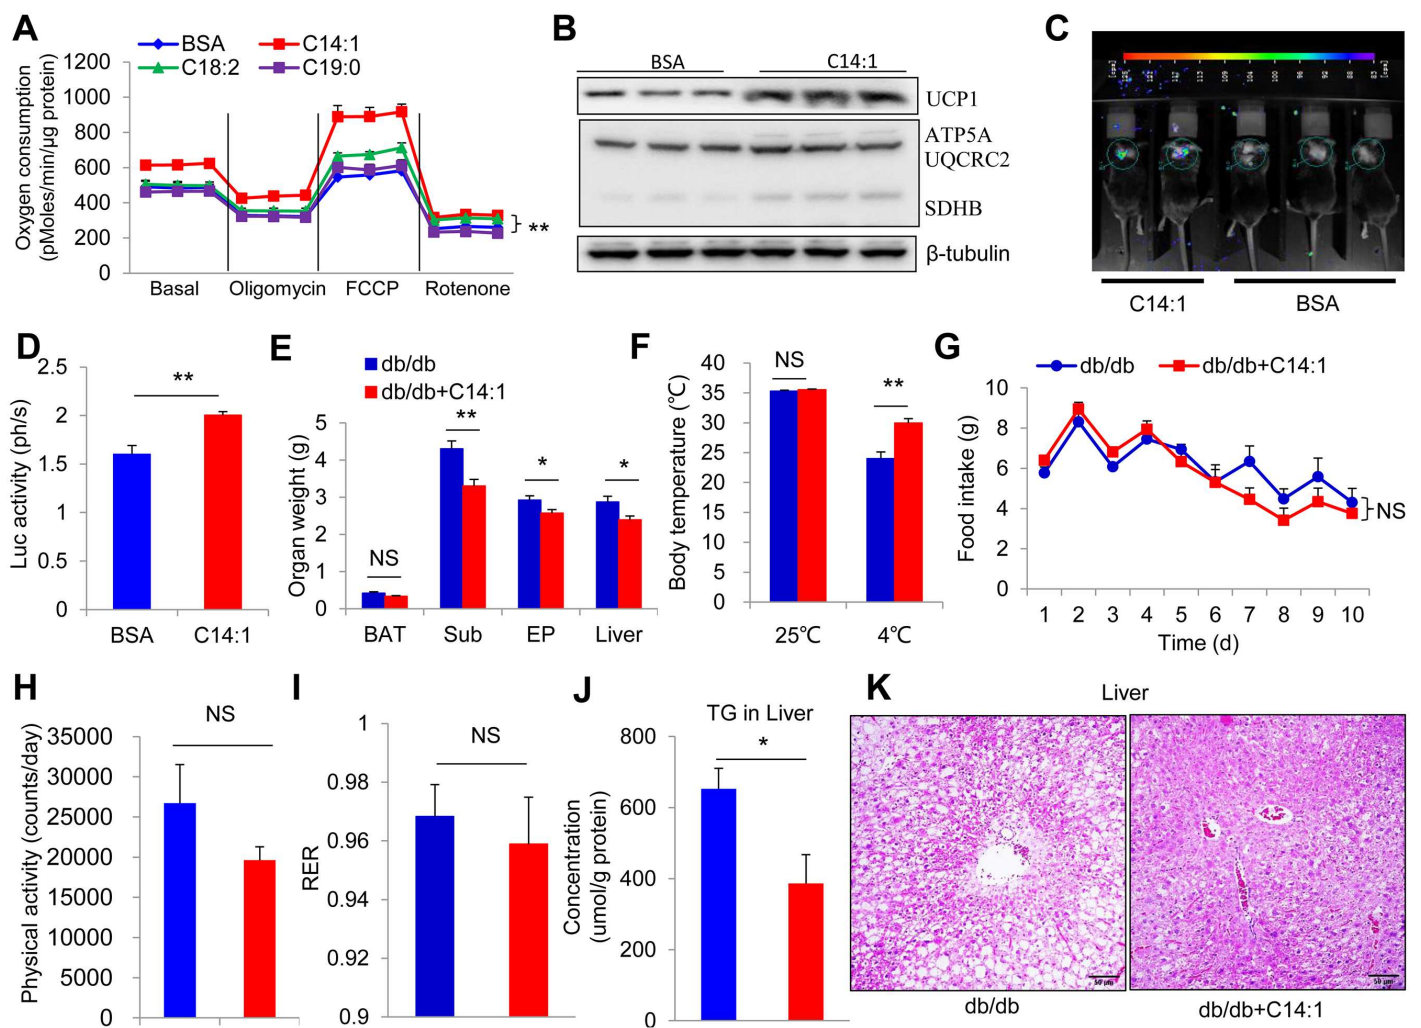

Supplement: inline-supplementary-material-5 [file inline-supplementary-material-5.pdf]

## Supplementary figure 5

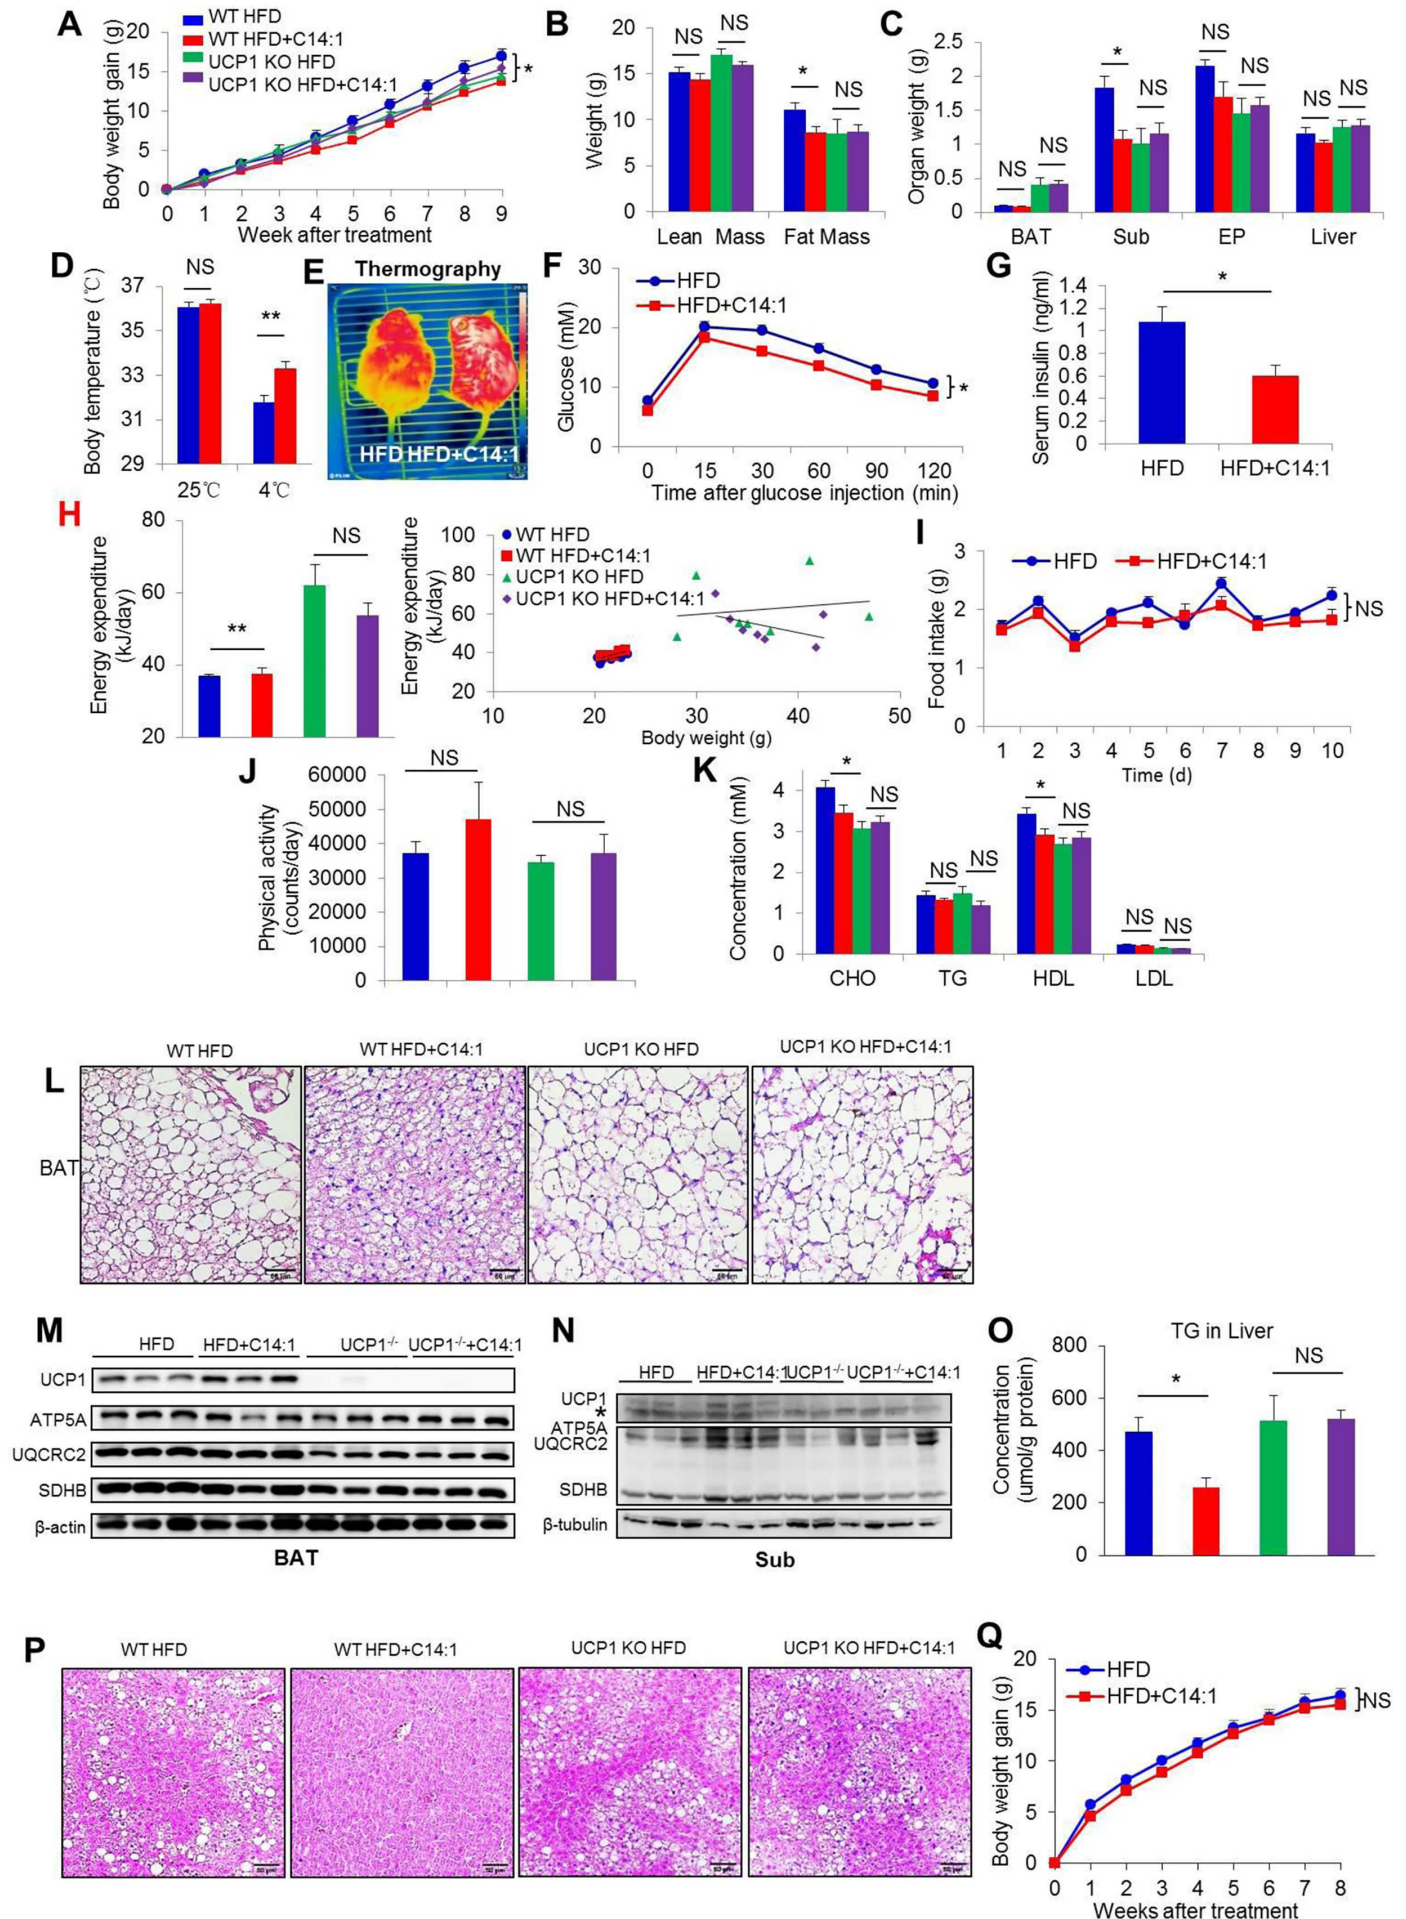

Supplement: inline-supplementary-material-6 [file inline-supplementary-material-6.pdf]

## Supplementary figure 6

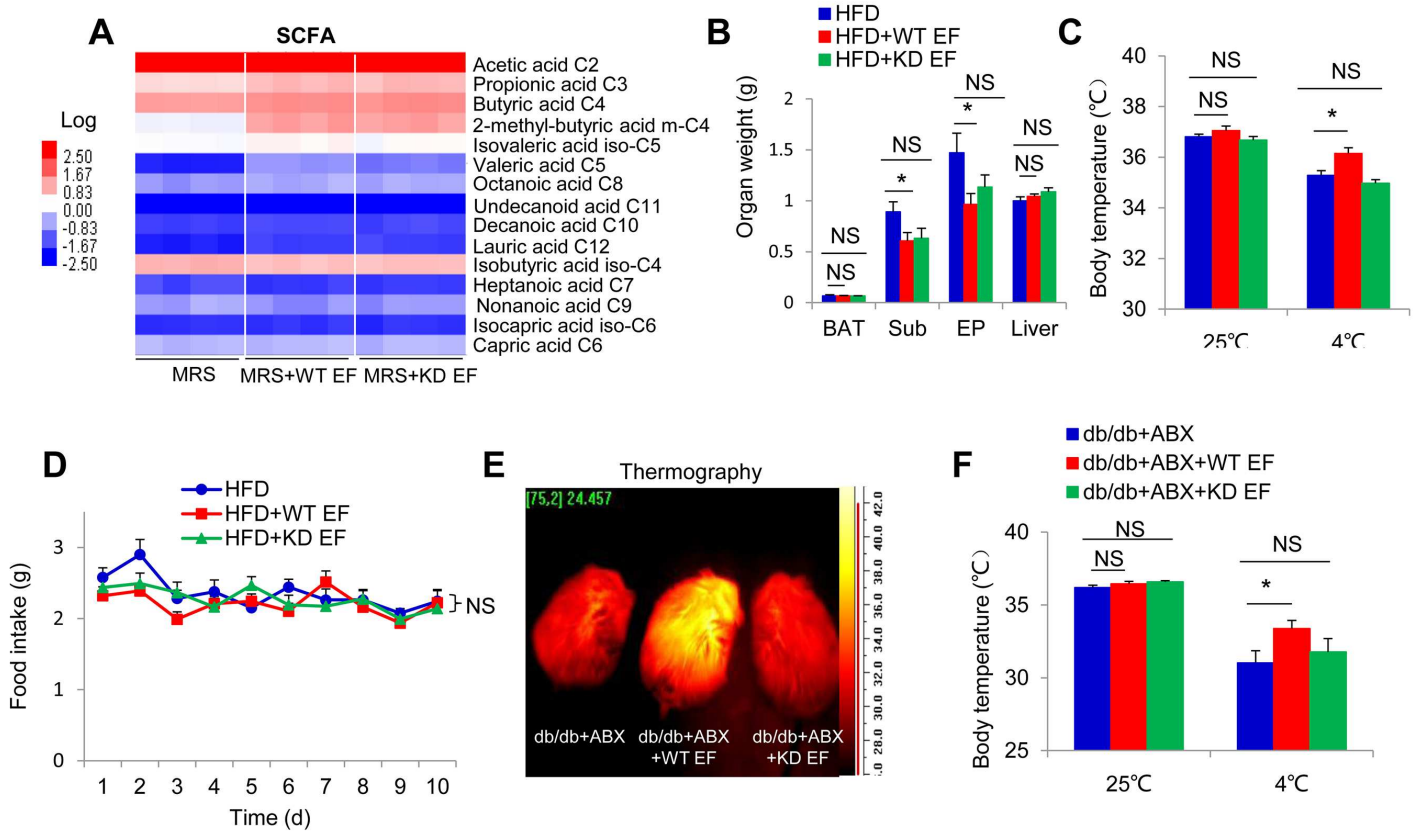

Supplement: inline-supplementary-material-7 [file inline-supplementary-material-7.pdf]
